# Supplementary material for: Mitigation of 3-deoxyglucosone and 5-hydroxymethylfurfural in brown fermented milk via an alternative browning process based on the hydrolysis of endogenous lactose
Source: Royal Society of Chemistry journal article supplement (doi:10.1039/c8fo02023j), 2019-01-01
Supplement: c8fo02023j1.pdf [file c8fo02023j1.pdf]

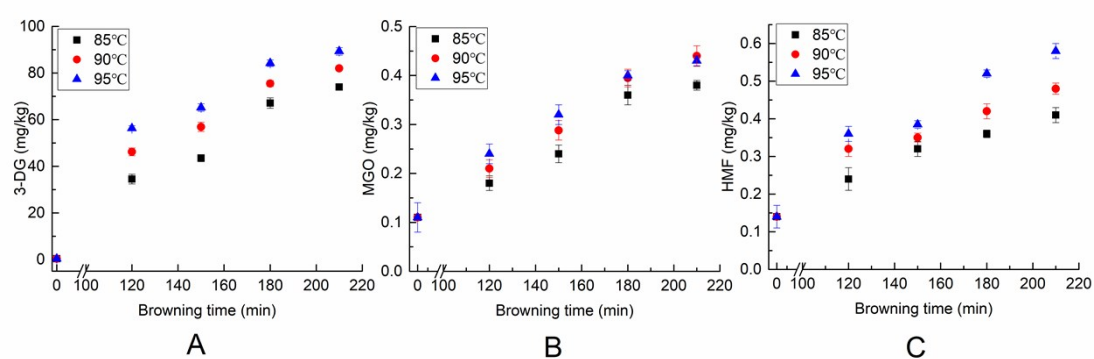

**Fig.S1** Changes in 3-deoxyglucosone (3-DG; A), methylglyoxal (MGO; B), and 5-(hydroxymethyl)-2-furfural (HMF; C) during the browning process of brown fermented milk (BFM).
